# Supplementary material for: A global survey identifies novel upstream components of the Ath5 neurogenic network
Source: PubMed Central journal article supplement (PMC2768981; doi:10.1186/gb-2009-10-9-r92), 2009-09-07
Supplement: gb-2009-10-9-r92-S1.pdf [file gb-2009-10-9-r92-S1.pdf]

## Supplemental Online Material

### **A global survey identifies novel upstream components of the *Ath5* neurogenic network**

Marcel Souren, Juan Ramon Martinez-Morales, Panagiota Makri, Beate Wittbrodt, Joachim Wittbrodt

Supplemental material includes 2 supplementary tables, 4 supplementary figures and supplementary methods.

#### **Figure legends**

##### **Table S1. Complete candidate list**

For each clone the fold-change of reporter activity is shown. For each individual gene, expression patterns were determined at all three stages of the wave spread using standard WISH. Wherever was possible, ensembl IDs were assigned to the clones, otherwise we assigned identifiers corresponding to the medaka genome project.

##### **Table S2. Dose response experiments**

**(A) Dose-response data using CMV promoter-driven control reporter (B) Dose-response data using SV40 promoter-driven control reporter** For each clone four different concentrations of candidate regulator were transfected. Candidates showing a linear dose-response are indicated in both.

##### **Figure S1. Behavior of known regulators under screening conditions**

Known regulators of *Ath5* were added at increasing concentration to the reporter assay. X-axis denotes the amount of regulator added per well. The y-axis shows fold-changes of luminescence normalized against an empty vector control. *Ath5*

and Pax6 effect as activators, and Hes-1 repressive activity are consistent with previously published results.

**Figure S2. Automatized in situ hybridization screen.**

Representative examples of expression patterns obtained in *in situ* hybridization screen. Expression was determined at three stages, initiation stage (stg24), progression stage (stg27) and steady wave stage (stg31). Relevant stages for representative examples are shown as dorsal whole mount images, anterior is to the left. A-F Group 1, repressors expressed in RPCs; G-I Group 2, SRP40, an activator expressed in RPCs; J,K Group 3, Islet-2, activator expressed in RGCs, L, RBPMS2, repressor in RGCs. M: ubiquitously expressed gene, p65; N,O genes expressed elsewhere, cytokeratin and MBX-S.

**Figure S3. Double-fluorescent whole-mount in situ hybridization of candidates (supplementary)**

All images are single horizontal confocal sections of the developing eye at the level of the lens with the embryo facing left. *Ath5* mRNA was detected using TSA-fluorescein (shown in green), regulator mRNA was visualized using FastRed staining (shown in purple).

**Figure S4 Analysis of 3kb regulatory *Ath5* sequence**

**(A) conservation and TFBS analysis.** Conserved sequences within fish species are shown in green. Putative transcription factor bindings sites (TFBS) were detected using the respective PWMs.

**(B) Functional test of conserved TFBS.** For each of the conserved TFBS labeled in red in (A) a 24bp fragment containing the TFBS was cloned upstream a luciferase gene coupled to a minimal promoter. The reporters were transfected with increasing amounts of the respective regulator under the control of the CMV-promoter. The relative luminescence normalized against a pCS2+ control is represented in the graphs. The numbers in brackets refer to the numbers TFBS in (A)

**Supplementary table 2 – dose-response data****(A)**

| Name                                         | GO                         | 20ng/ well  | 40ng/ well  | 80ng/ well  | 160ng/ well |
|----------------------------------------------|----------------------------|-------------|-------------|-------------|-------------|
| <b>Clones with a linear dose-response</b>    |                            |             |             |             |             |
| ARG1                                         |                            | 1.45 ± 0.06 | 0.48 ± 0.03 | 0.61 ± 0.03 | 0.61 ± 0.01 |
| Bcat2                                        | Nucleic acid binding       | 0.97 ± 0.05 | 1.11 ± 0.02 | 1.88 ± 0.21 | 1.77 ± 0.12 |
| cbx7                                         | Nucleic acid binding       | 0.37 ± 0.05 | 1.97 ± 0.12 | 2.88 ± 0.04 | 4.18 ± 0.14 |
| CEB55                                        |                            | 0.84 ± 0.11 | 1.06 ± 0.09 | 1.08 ± 0.04 | 1.62 ± 0.32 |
| Cnot10                                       | Other transcription factor | 0.48 ± 0.07 | 0.50 ± 0.02 | 0.53 ± 0.03 | 0.71 ± 0.02 |
| ELG protein                                  |                            | 0.47 ± 0.07 | 1.06 ± 0.03 | 2.12 ± 0.51 | 1.98 ± 0.15 |
| FAN                                          |                            | 0.66 ± 0.02 | 0.99 ± 0.05 | 1.02 ± 0.03 | 1.27 ± 0.07 |
| GPI deacylase                                | Nucleic acid binding       | 0.99 ± 0.09 | 1.24 ± 0.04 | 1.55 ± 0.08 | 2.42 ± 0.29 |
| Idax                                         |                            | 0.33 ± 0.04 | 0.34 ± 0.00 | 0.32 ± 0.02 | 0.23 ± 0.03 |
| Islet2                                       | Transcription factor       | 1.45 ± 0.10 | 2.27 ± 0.32 | 3.76 ± 0.17 | 7.27 ± 2.01 |
| KPNA4                                        | Other transcription factor | 0.64 ± 0.04 | 0.80 ± 0.04 | 0.66 ± 0.03 | 0.58 ± 0.02 |
| MCM3                                         | Nucleic acid binding       | 0.68 ± 0.05 | 0.69 ± 0.07 | 0.64 ± 0.01 | 0.56 ± 0.03 |
| Ndr3a                                        |                            | 0.50 ± 0.03 | 0.61 ± 0.07 | 0.74 ± 0.02 | 1.31 ± 0.32 |
| NHL-protein                                  |                            | 0.74 ± 0.16 | 0.47 ± 0.03 | 0.38 ± 0.02 | 0.48 ± 0.04 |
| p65 TF                                       | Transcription factor       | 0.57 ± 0.03 | 1.43 ± 0.07 | 2.13 ± 0.03 | 5.15 ± 1.07 |
| PTPN2                                        |                            | 1.06 ± 0.06 | 0.93 ± 0.07 | 1.29 ± 0.07 | 1.45 ± 0.01 |
| Rb1                                          | Other transcription factor | 1.09 ± 0.08 | 1.04 ± 0.10 | 1.44 ± 0.07 | 1.71 ± 0.01 |
| RBPM52                                       | Nucleic acid binding       | 0.61 ± 0.03 | 0.60 ± 0.04 | 0.63 ± 0.06 | 0.75 ± 0.05 |
| sFRP-1                                       |                            | 0.59 ± 0.03 | 0.79 ± 0.06 | 0.41 ± 0.08 | 0.39 ± 0.09 |
| SRP40                                        | Nucleic acid binding       | 0.76 ± 0.08 | 1.82 ± 0.11 | 2.28 ± 0.19 | 3.11 ± 0.27 |
| Sterol demethylase                           |                            | 1.47 ± 0.08 | 1.40 ± 0.15 | 1.86 ± 0.07 | 2.56 ± 0.21 |
| Thiolase                                     |                            | 0.87 ± 0.10 | 0.97 ± 0.04 | 1.21 ± 0.18 | 2.06 ± 0.27 |
| Transferase                                  |                            | 1.05 ± 0.05 | 1.12 ± 0.11 | 1.36 ± 0.05 | 1.50 ± 0.06 |
| USP25                                        |                            | 0.59 ± 0.06 | 0.64 ± 0.10 | 0.72 ± 0.04 | 0.62 ± 0.07 |
| Zfp 161                                      |                            | 0.61 ± 0.02 | 0.40 ± 0.02 | 0.34 ± 0.02 | 0.28 ± 0.02 |
| <b>Clones without a linear dose-response</b> |                            |             |             |             |             |
| ATP-Synthase                                 |                            | 1.08 ± 0.05 | 0.72 ± 0.07 | 0.72 ± 0.05 | 8.58 ± 1.83 |
| bub3                                         |                            | 0.62 ± 0.02 | 0.74 ± 0.02 | 0.71 ± 0.03 | 1.01 ± 0.28 |
| DuS4L                                        |                            | 0.80 ± 0.05 | 1.01 ± 0.12 | 1.31 ± 0.06 | 1.95 ± 0.13 |
| EF-1-alpha                                   |                            | 1.03 ± 0.18 | 0.84 ± 0.05 | 1.15 ± 0.07 | 1.55 ± 0.14 |
| Hsp1                                         |                            | 0.74 ± 0.13 | 0.99 ± 0.09 | 1.02 ± 0.06 | 1.33 ± 0.22 |
| KPNA2                                        | Other transcription factor | 1.08 ± 0.03 | 0.93 ± 0.06 | 1.12 ± 0.02 | 1.38 ± 0.04 |
| MCM2                                         | Other transcription factor | 0.84 ± 0.04 | 1.12 ± 0.04 | 1.47 ± 0.03 | 1.58 ± 0.03 |
| MRPL47                                       | Nucleic acid binding       | 0.67 ± 0.05 | 0.83 ± 0.07 | 0.73 ± 0.07 | 0.85 ± 0.06 |
| NHL-protein II                               |                            | 0.85 ± 0.04 | 0.75 ± 0.04 | 1.00 ± 0.05 | 1.09 ± 0.08 |
| RBM4L                                        |                            | 0.56 ± 0.02 | 0.51 ± 0.02 | 0.70 ± 0.15 | 0.60 ± 0.03 |
| Ribonuclease                                 | Other transcription factor | 0.80 ± 0.05 | 0.84 ± 0.04 | 0.89 ± 0.06 | 1.21 ± 0.21 |
| Samd11                                       |                            | 0.79 ± 0.16 | 0.83 ± 0.07 | 0.86 ± 0.06 | 1.47 ± 0.23 |
| TARBP2                                       | Nucleic acid binding       | 0.61 ± 0.06 | 0.74 ± 0.06 | 0.58 ± 0.03 | 0.84 ± 0.06 |

|                   |                            |             |             |             |             |
|-------------------|----------------------------|-------------|-------------|-------------|-------------|
| Tetraspanin-9     | Other transcription factor | 0.76 ± 0.06 | 0.73 ± 0.01 | 0.93 ± 0.01 | 1.17 ± 0.04 |
| TMEM79            |                            | 0.64 ± 0.04 | 1.06 ± 0.08 | 1.09 ± 0.07 | 1.54 ± 0.06 |
| tubulin-like      |                            | 0.60 ± 0.07 | 0.71 ± 0.03 | 0.95 ± 0.02 | 0.89 ± 0.03 |
| UBR2              |                            | 0.80 ± 0.19 | 1.04 ± 0.04 | 1.03 ± 0.03 | 0.00 ± 0.00 |
| Uncharacterized 3 |                            | 1.28 ± 0.09 | 0.73 ± 0.03 | 1.01 ± 0.06 | 1.33 ± 0.16 |
| USP1              | Nucleic acid binding       | 0.57 ± 0.02 | 0.97 ± 0.03 | 0.67 ± 0.02 | 0.81 ± 0.03 |
| WDR43             |                            | 0.67 ± 0.11 | 1.43 ± 0.19 | 1.39 ± 0.09 | 1.23 ± 0.05 |

(B)

| Name                                         | 20ng/ well  | 40ng/ well    | 80ng/ well    | 160ng/ well   |
|----------------------------------------------|-------------|---------------|---------------|---------------|
| <b>Clones with a linear dose-response</b>    |             |               |               |               |
| Bcat2                                        | 0.91 ± 0.07 | 1.04 ± 0.10   | 1.35 ± 0.15   | 1.59 ± 0.20   |
| Cbx7                                         | 1.25 ± 0.06 | 1.54 ± 0.16   | 1.83 ± 0.14   | 2.96 ± 0.06   |
| CEB55                                        | 1.23 ± 0.14 | 1.07 ± 0.36   | 1.51 ± 0.54   | 2.69 ± 0.17   |
| Cnot10                                       | 0.42 ± 0.11 | 0.51 ± 0.07   | 0.43 ± 0.03   | 0.44 ± 0.04   |
| DuS4L                                        | 0.51 ± 0.04 | 0.52 ± 0.06   | 0.48 ± 0.02   | 0.58 ± 0.01   |
| ELG protein                                  | 0.42 ± 0.05 | 0.49 ± 0.04   | 0.43 ± 0.07   | 0.56 ± 0.04   |
| GPI deacylase                                | 1.01 ± 0.08 | 1.29 ± 0.06   | 1.75 ± 0.39   | 2.18 ± 0.08   |
| Idax                                         | 0.19 ± 0.01 | 0.20 ± 0.02   | 0.16 ± 0.01   | 0.17 ± 0.03   |
| Islet2                                       | 0.95 ± 0.06 | 1.76 ± 0.14   | 2.06 ± 0.06   | 4.36 ± 0.41   |
| KPNA4                                        | 0.43 ± 0.01 | 0.42 ± 0.03   | 0.38 ± 0.01   | 0.44 ± 0.04   |
| MCM2                                         | 0.55 ± 0.06 | 0.62 ± 0.03   | 0.62 ± 0.08   | 0.71 ± 0.07   |
| MCM3                                         | 0.58 ± 0.03 | 0.537 ± 0.018 | 0.445 ± 0.013 | 0.425 ± 0.047 |
| Ndr3a                                        | 0.99 ± 0.15 | 0.63 ± 0.02   | 0.70 ± 0.03   | 0.70 ± 0.04   |
| NHL-protein                                  | 0.55 ± 0.03 | 0.59 ± 0.02   | 0.57 ± 0.06   | 0.62 ± 0.09   |
| p65 TF                                       | 1.73 ± 0.29 | 7.67 ± 1.24   | 15.66 ± 0.62  | 29.58 ± 2.94  |
| PTPN2                                        | 1.45 ± 0.42 | 0.90 ± 0.33   | 0.76 ± 0.20   | 0.63 ± 0.07   |
| Rb1                                          | 2.09 ± 0.24 | 1.87 ± 0.41   | 1.38 ± 0.09   | 1.18 ± 0.14   |
| RBPMS2                                       | 0.62 ± 0.07 | 0.55 ± 0.05   | 0.84 ± 0.24   | 7.81 ± 1.23   |
| Samd11                                       | 0.81 ± 0.22 | 0.60 ± 0.06   | 0.57 ± 0.05   | 0.53 ± 0.03   |
| sFRP-1                                       | 1.92 ± 0.13 | 2.75 ± 0.19   | 4.78 ± 0.64   | 6.04 ± 0.84   |
| SRP40                                        | 0.93 ± 0.01 | 1.00 ± 0.08   | 1.13 ± 0.12   | 1.37 ± 0.07   |
| Sterol demethylase                           | 0.91 ± 0.05 | 1.55 ± 0.12   | 1.47 ± 0.03   | 2.60 ± 0.10   |
| TARBP2                                       | 0.52 ± 0.03 | 0.31 ± 0.02   | 0.36 ± 0.07   | 0.32 ± 0.04   |
| Tetraspanin-9                                | 0.81 ± 0.04 | 0.99 ± 0.15   | 1.01 ± 0.08   | 2.15 ± 0.25   |
| Thiolase                                     | 0.91 ± 0.11 | 1.23 ± 0.09   | 1.86 ± 0.08   | 3.33 ± 0.21   |
| TMP49                                        | 0.55 ± 0.01 | 0.59 ± 0.03   | 0.70 ± 0.00   | 1.18 ± 0.08   |
| USP1                                         | 0.71 ± 0.06 | 0.73 ± 0.16   | 0.38 ± 0.09   | 0.48 ± 0.04   |
| Zfp 161                                      | 0.68 ± 0.04 | 0.63 ± 0.01   | 0.65 ± 0.04   | 0.64 ± 0.02   |
| <b>Clones without a linear dose-response</b> |             |               |               |               |
| ARG1                                         | 0.68 ± 0.10 | 1.11 ± 0.52   | 0.90 ± 0.27   | 0.92 ± 0.16   |
| Bub3                                         | 0.84 ± 0.25 | 1.05 ± 0.29   | 0.79 ± 0.06   | 1.09 ± 0.08   |
| KPNA2                                        | 0.88 ± 0.13 | 1.14 ± 0.27   | 0.92 ± 0.12   | 1.12 ± 0.12   |
| MRPL47                                       | 0.72 ± 0.11 | 0.77 ± 0.03   | 0.62 ± 0.12   | 1.38 ± 0.20   |
| Ribonuclease                                 | 0.75 ± 0.09 | 0.62 ± 0.03   | 0.76 ± 0.11   | 0.73 ± 0.05   |
| Uncharacterized 3                            | 0.77 ± 0.29 | 0.97 ± 0.13   | 0.77 ± 0.14   | 0.74 ± 0.16   |

|       |                 |                 |                 |                  |
|-------|-----------------|-----------------|-----------------|------------------|
| USP25 | $0.85 \pm 0.13$ | $1.10 \pm 0.27$ | $0.72 \pm 0.22$ | $0.75 \pm 0.06$  |
| WDR43 | $0.70 \pm 0.05$ | $1.17 \pm 0.26$ | $0.80 \pm 0.19$ | $0.824 \pm 0.15$ |

**Table S1 - List of candidates****Repressors**

| <b>Name</b>       | <b>Fold-change</b> | <b>expressed</b> | <b>ID</b>           |
|-------------------|--------------------|------------------|---------------------|
| CRTAP             | 0.16 ± 0.01        | Elsewhere        | ENSORLG00000011852  |
| Idax              | 0.16 ± 0.01        | In RGCs          | ENSORLG00000006474  |
| Cnot10            | 0.17 ± 0.02        | In RPCs          | ENSORLG00000003576  |
| LPP3-like         | 0.18 ± 0.00        | Elsewhere        | ENSORLG00000006759  |
| TOR1AIP1          | 0.19 ± 0.00        | No expression    | ENSORLG00000016657  |
| RBPMS2            | 0.20 ± 0.06        | In RGCs          | ENSORLG00000001493  |
| AATF              | 0.21 ± 0.02        | In RPCs          | ENSORLG00000013628  |
| Uncharacterized 1 | 0.22 ± 0.01        | Ubiquitous       | UTOLAPRE05100106330 |
| RBM4L             | 0.23 ± 0.01        | In RGCs          | ENSORLG00000011589  |
| Zfp 410           | 0.24 ± 0.03        | Elsewhere        | ENSORLG00000009376  |
| Zfp 161           | 0.24 ± 0.02        | In RGCs          | ENSORLG00000004128  |
| KPNA4             | 0.25 ± 0.04        | In RPCs          | ENSORLG00000006226  |
| Ikaros            | 0.25 ± 0.03        | Elsewhere        | ENSORLG00000020562  |
| NHL-protein       | 0.27 ± 0.00        | In RGCs          | ENSORLG00000014595  |
| MCM2              | 0.27 ± 0.00        | In RPCs          | ENSORLG00000003191  |
| Beta-actin        | 0.27 ± 0.03        | Ubiquitously     | ENSORLG00000013676  |
| ARG1              | 0.27 ± 0.02        | In RPCs          | UTOLAPRE05100101036 |
| ELG protein       | 0.27 ± 0.00        | In RGCs          | ENSORLG00000013703  |
| Tubulin-like      | 0.27 ± 0.04        | Elsewhere        | ENSORLG00000016464  |
| Fibronectin-like  | 0.27 ± 0.03        | No expression    | ENSORLG00000002976  |
| Actin-like        | 0.27 ± 0.02        | Elsewhere        | ENSORLG00000017368  |
| Apo-AI            | 0.28 ± 0.03        | Elsewhere        | ENSORLG00000015744  |
| DuS4L             | 0.28 ± 0.01        | In RPCs          | ENSORLG00000008306  |
| USP25             | 0.28 ± 0.05        | In RPCs          | ENSORLG00000000577  |
| MBX-S             | 0.28 ± 0.01        | Elsewhere        | ENSORLG00000008964  |
| Hsbp1             | 0.28 ± 0.02        | Elsewhere        | ENSORLG00000015789  |
| ATP-Synthase      | 0.28 ± 0.04        | In RPCs          | ENSORLG00000003517  |
| WDR43             | 0.29 ± 0.04        | In RPCs          | ENSORLG00000018236  |

**Activators**

| <b>Name</b>          | <b>Fold-change</b> | <b>expressed</b> | <b>ID</b>           |
|----------------------|--------------------|------------------|---------------------|
| SRP40                | 2.88 ± 0.10        | In RPCs          | ENSORLG00000009268  |
| Heatr5B              | 2.91 ± 0.31        | No expression    | ENSORLG00000012398  |
| HMG                  | 2.93 ± 0.49        | Ubiquitously     | ENSORLG00000008779  |
| Bcat2                | 2.93 ± 0.27        | In RPCs          | ENSORLG00000001573  |
| Cbx7                 | 2.96 ± 0.14        | In RPCs          | ENSORLG00000013869  |
| sFRP-1               | 2.97 ± 0.55        | In RPCs          | ENSORLG00000016179  |
| Nfkbia               | 2.99 ± 0.44        | Ubiquitously     | ENSORLG00000017687  |
| Tetraspanin 31       | 3.00 ± 0.38        | In RGCs          | ENSORLG00000016592  |
| MCM3                 | 3.00 ± 0.00        | In RPCs          | ENSORLG00000016187  |
| FBXL3                | 3.00 ± 0.48        | No expression    | ENSORLG00000011408  |
| TMEM79               | 3.01 ± 0.30        | In RPCs          | ENSORLG00000008212  |
| TARBP2               | 3.05 ± 0.18        | In RPCs          | ENSORLG00000005209  |
| GNS                  | 3.12 ± 0.27        | Elsewhere        | ENSORLG00000016835  |
| PFKFB4               | 3.12 ± 0.36        | No expression    | ENSORLG00000013355  |
| UBR2                 | 3.18 ± 0.36        | Ubiquitously     | ENSORLG00000003350  |
| MNAT1                | 3.22 ± 0.00        | No expression    | ENSORLG00000015749  |
| USP1                 | 3.24 ± 0.34        | In RPCs          | ENSORLG00000010503  |
| Coiled-coil contain. | 3.25 ± 0.43        | Ubiquitously     | UTOLAPRE05100105142 |
| PYGL                 | 3.27 ± 0.50        | elsewhere        | ENSORLG00000008955  |
| Tubulin beta-chain   | 3.28 ± 0.59        | ubiquitously     | ENSORLG00000016464  |
| FAN                  | 3.28 ± 0.28        | in RPCs          | ENSORLG00000005939  |
| Tetraspanin-9        | 3.29 ± 0.00        | in RPCs          | ENSORLG00000016594  |
| EF-1-alpha           | 3.31 ± 0.26        | Ubiquitously     | ENSORLG00000007614  |

|                    |              |               |                     |
|--------------------|--------------|---------------|---------------------|
| Ankrd43            | 3.33 ± 0.41  | No expression | ENSORLG00000005833  |
| MRPL47             | 3.33 ± 0.00  | In RPCs       | ENSORLG00000005717  |
| Sterol demethylase | 3.33 ± 0.33  | In RPCs       | ENSORLG00000020002  |
| Cytokeratin-8      | 3.33 ± 0.22  | Elsewhere     | UTOLAPRE05100109764 |
| NHL-domain II      | 3.36 ± 0.59  | In RPCs       | ENSORLG00000014595  |
| Transferase        | 3.39 ± 0.58  | In RPCs       | ENSORLG00000015041  |
| Rb1                | 3.50 ± 0.45  | In RPCs       | ENSORLG00000008317  |
| Aldh1a2            | 3.53 ± 0.00  | Elsewhere     | ENSORLG00000008319  |
| OTCase             | 3.55 ± 0.00  | Elsewhere     | ENSORLG00000009056  |
| PTPN2              | 3.65 ± 0.59  | In RPCs       | ENSORLG00000002826  |
| KPNA2              | 3.65 ± 0.36  | In RPCs       | ENSORLG00000015192, |
| Synthropin         | 3.69 ± 0.16  | No expression | UTOLAPRE05100112103 |
| Ndr3a              | 3.73 ± 0.00  | In RGCs       | ENSORLG00000013821  |
| Sox-14             | 3.74 ± 0.33  | Elsewhere     | ENSORLG00000011685  |
| MRTF-8             | 3.75 ± 0.44  | No expression | ENSORLG00000005094  |
| Jun                | 3.76 ± 0.24  | No expression | ENSORLG00000017506  |
| Nfkbie             | 3.80 ± 0.15  | No expression | ENSORLG00000009824  |
| FBXW5              | 3.86 ± 0.36  | Elsewhere     | ENSORLG00000007130  |
| PPAP2C             | 3.86 ± 0.00  | Elsewhere     | ENSORLG00000014235  |
| ERG                | 3.89 ± 0.12  | Elsewhere     | ENSORLG00000015940  |
| TMP49              | 3.92 ± 0.42  | No expression | ENSORLG00000012702  |
| ARNT2              | 4.08 ± 0.78  | Elsewhere     | ENSORLG00000019479  |
| Grou2 rTLE3        | 4.12 ± 0.09  | Elsewhere     | ENSORLG00000006700  |
| Ribonuclease       | 4.15 ± 0.09  | In RPCs       | ENSORLG00000004042  |
| Sfrs4              | 4.23 ± 0.23  | No expression | ENSORLG00000009430  |
| Aminoacylase-1     | 4.24 ± 0.00  | No expression | ENSORLG00000002219  |
| Rab-18             | 4.63 ± 0.00  | Elsewhere     | ENSORLG00000009609  |
| CEB55              | 4.70 ± 0.39  | In RPCs       | ENSORLG00000005053  |
| Bub3               | 4.85 ± 0.00  | In RPCs       | ENSORLG00000018829  |
| Thiolase           | 4.98 ± 0.32  | In RPCs       | ENSORLG00000009609  |
| Islet2             | 5.11 ± 0.22  | In RGCs       | ENSORLG00000012362  |
| WDR45L             | 5.16 ± 0.77  | No expression | ENSORLG00000012984  |
| CRMp4              | 5.28 ± 0.61  | Elsewhere     | ENSORLG00000019028  |
| Ankrd39            | 5.40 ± 0.71  | Ubiquitously  | ENSORLG00000014221  |
| Samd11             | 5.50 ± 0.00  | Elsewhere     | ENSORLG00000005568  |
| HoxA9              | 5.57 ± 0.29  | Elsewhere     | ENSORLG00000005025  |
| Uncharacterized 2  | 5.90 ± 0.00  | Elsewhere     | ENSORLG00000001089  |
| p65 TF             | 6.16 ± 0.81  | Ubiquitously  | ENSORLG00000011104  |
| Uncharacterized 3  | 6.62 ± 0.62  | No expression | ENSORLG00000017609  |
| Hsp1               | 11.02 ± 1.36 | In RPCs       | ENSORLG00000020428  |
| GPI deacylase      | 15.00 ± 0.81 | In RPCs       | ENSORLG00000018243  |
| Deiodinase         | 16.77 ± 0.20 | No expression | ENSORLG00000014548  |

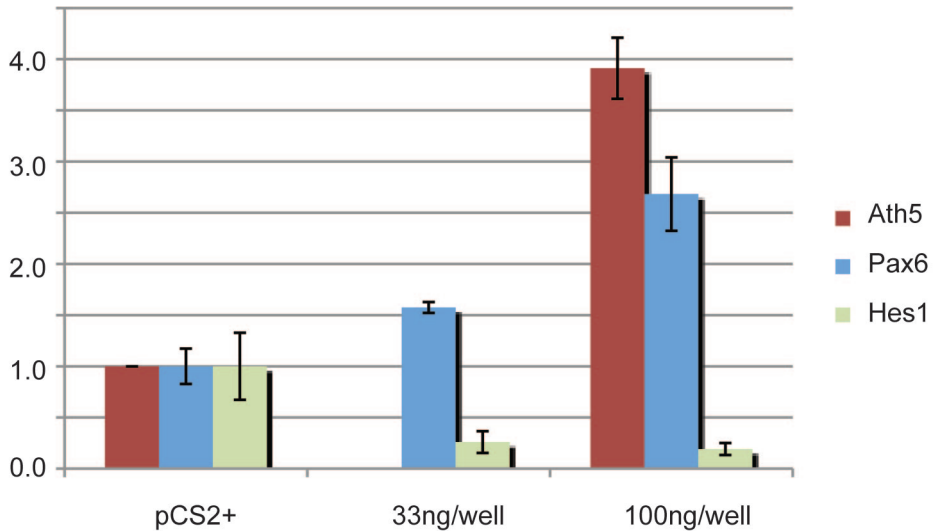

Figure S1 control regulators of Ath5



Repressors in RPCs

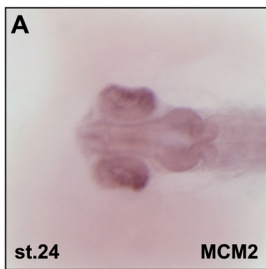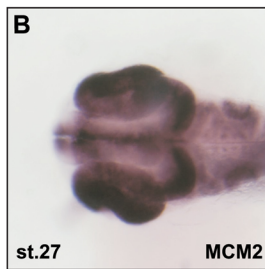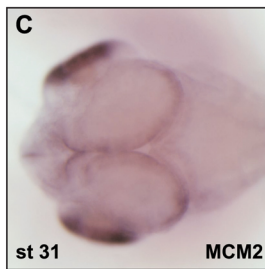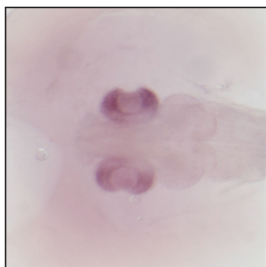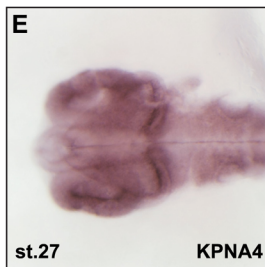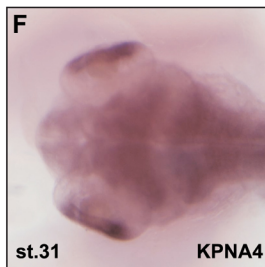

Activator in RPCs

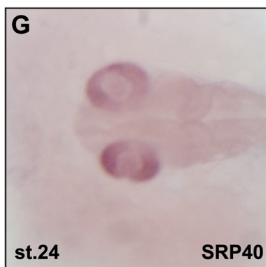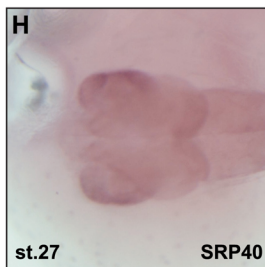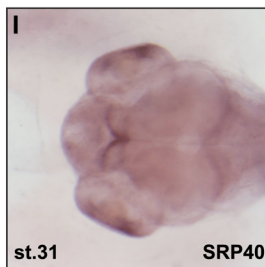

Activator in RGCs

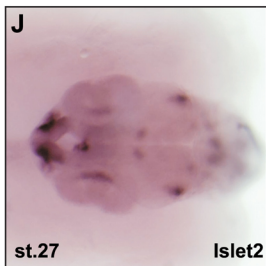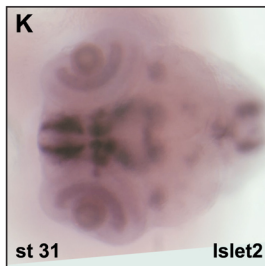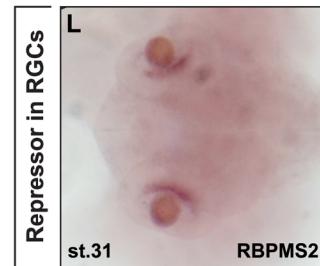

Ubiquitous expression

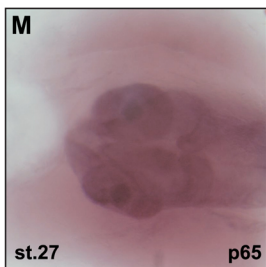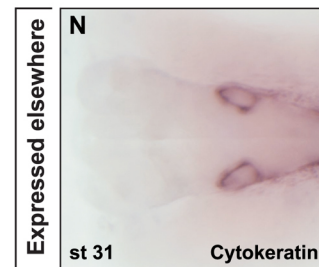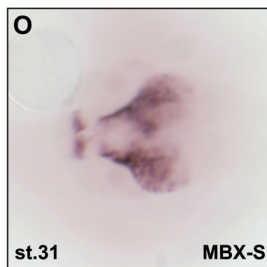

Expressed elsewhere

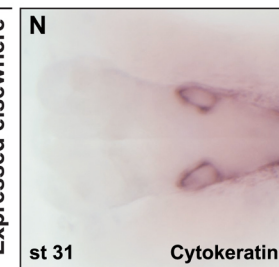

Figure S2 WISH

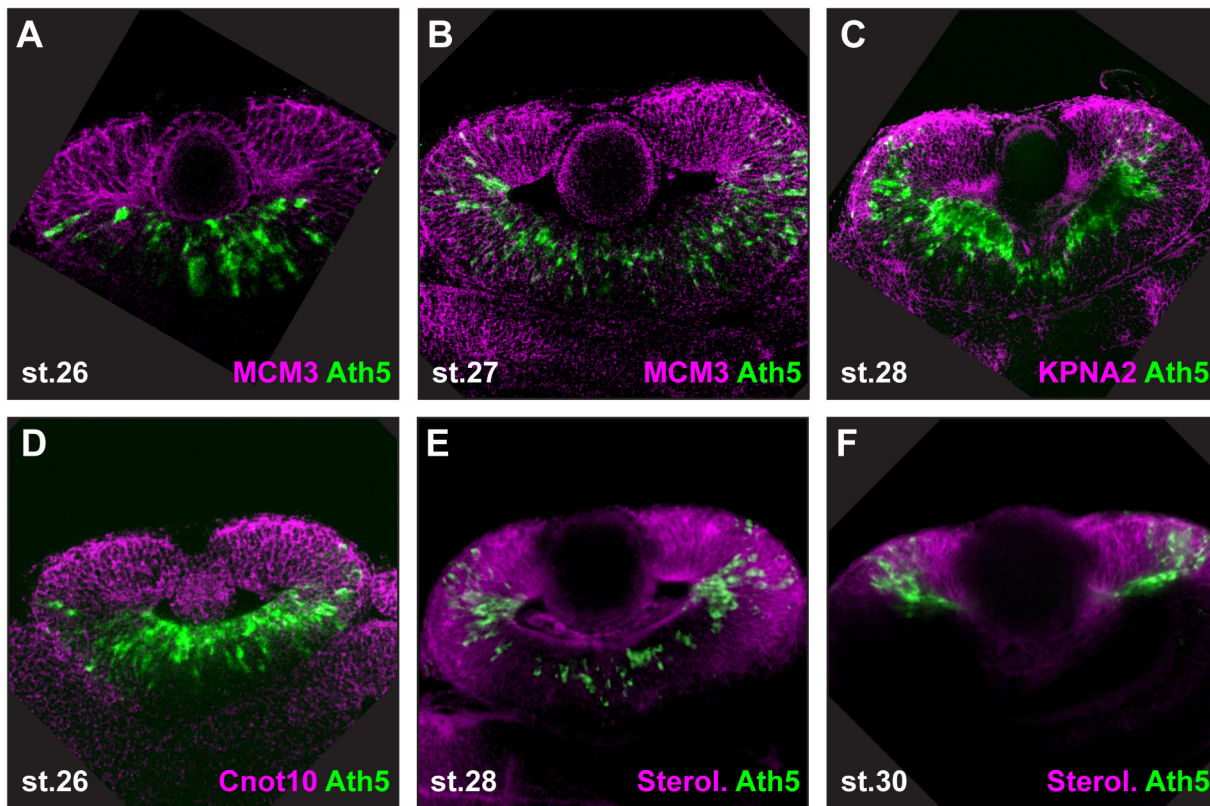

Figure S3 DWISH

# A 3kb regulatory sequence of *Ath5*

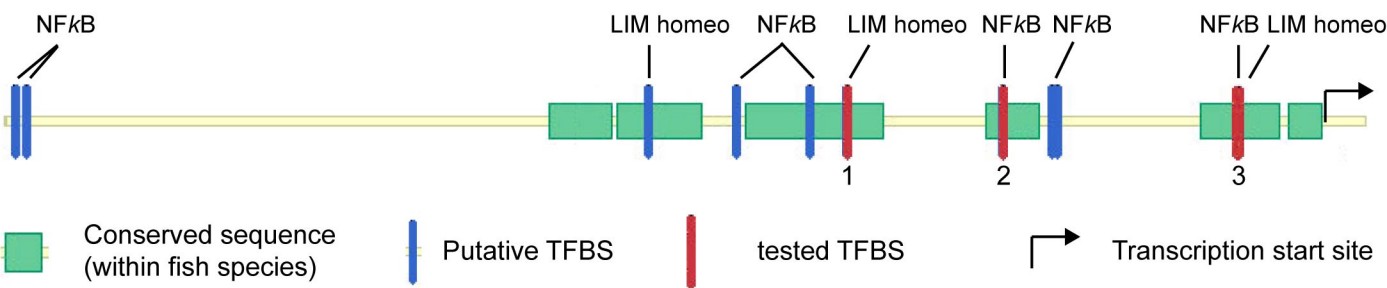

## B (1)

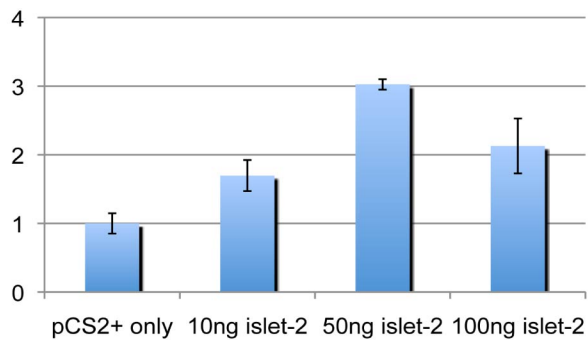

## (2)

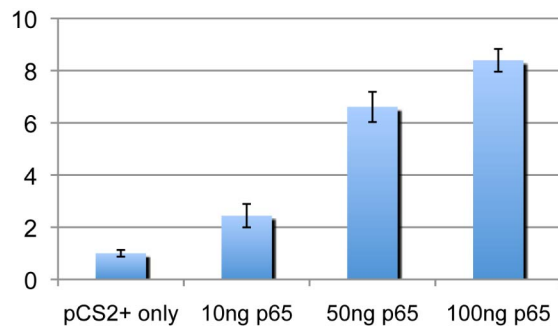

## (3)

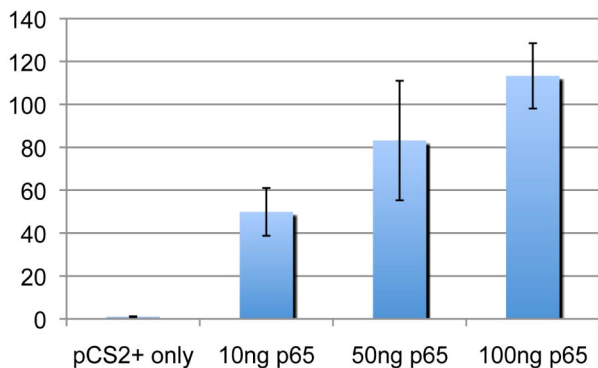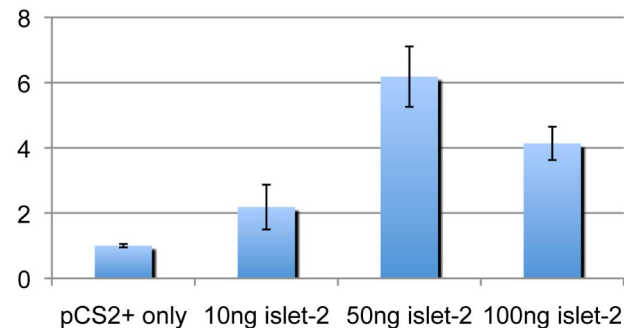

Figure S4

## Supplementary methods

### Screening setup

For each clone the trans-regulatory effect on the *Ath5* promoter was tested in triplicate. The cDNAs were supplied as DNA mini-preparations in TE-buffer in 96-well plates by the in-house EMBL genomic service. For each round of seeding, transfection and luciferase assays 8 96-well plates of clones were assayed in triplicate, i.e. 24 96-well plates of cells were handled per round of screening. From each well 6µl containing an average of 300ng of DNA were transferred into a fresh 96-well plate using a 12-channel pipette. In parallel pGL3 *Ath5*::Luc and pRL-CMV were added to serum-free medium and mixed well. Transfection reagent was added and mixed with the DNA solution. Using an 8-channel multistep pipette 150µl of the solution were immediately added to the cDNA solution in the 96-well plates and incubated for 30min. 48µl of this DNA-transfection reagent mixture were then added to the cell as described below.

| Component                    | Amount/ volume per well |
|------------------------------|-------------------------|
| pGL3 <i>Ath5</i> ::Luc       | 40ng                    |
| pRL-CMV                      | 5ng                     |
| pCMV-Sport6.1::cDNA          | 2µl (on average 80ng)   |
| FuGENE6 transfection reagent | 435nl                   |

**Table 1 Transfected components per well in large scale screen**

### Transfection and passive lysis

Prior to transfection, cells of a 9cm Petri dish at 90% confluency were trypsinised, detached from each other by pipetting up and down and resuspended in 10ml of standard medium. This stock suspension was diluted 1:30 in fresh standard medium. 200µl of this working suspension were transferred into each well of a white-bottom

96-well plate<sup>1</sup> using a multichannel-multistep pipette<sup>2</sup>. Cells were then allowed to re-attach to the bottom of the well and grow for 5h-6h until they reached 50% confluency. Prior to transfection the different plasmids were mixed with FuGENE6 transfection reagent<sup>3</sup> in serum-free medium<sup>4</sup> at room temperature. For each well 40ng of pGL3 *Ath5*::luc2 vector, 5ng of pRL-CMV vector and 10ng-300ng of pCMV-Sport6.1::cDNA were mixed with 3-6fold volume-excess of FuGENE6 transfection reagent in 50µl serum-free medium. After a 30min incubation the mixture was added drop-wise into the 96-well plates containing the cells. Cells were allowed to grow for 42h at 37°C. The medium was removed and cells were lysed with 1X passive lysis buffer<sup>5</sup> for 15min while shaking. To avoid loss of luciferase activity the lysate was immediately used for luminescence assays. Alternatively, plates were kept at 4°C for up to 6 hours.

### **Luciferase assays**

Luciferase assays were carried out in a luminometer<sup>6</sup> containing two dispensers and a stacker device. Substrates for the assays were obtained from a commercial supplier<sup>7</sup>. The LARII solution was prepared in advance and frozen in aliquots at -80°C. The Stop&Glow solution was prepared freshly for each luminometer run. Leftovers were frozen for one month maximum at -80°C and mixed with fresh Stop&Glow solution. Measurements were carried out for one well after the other. After addition of 45µl LARII reagent containing the substrate luciferin for the firefly

---

<sup>1</sup> OptiPlate-96, White Opaque 96-well Microplate, PerkinElmer, Rodgau-Jügesheim, Germany, Cat.-No. 6005299

<sup>2</sup> ResearchPro, 50-1.200 µl, 8-channel, Eppendorf, Hamburg, Germany, Cat.-No. 4860 000.577

<sup>3</sup> FuGENE6 Transfection Reagent, Roche Diagnostics GmbH, Mannheim, Germany, Cat.-No. 11988387001

<sup>4</sup> Opti-MEM® I Reduced Serum Medium (1X), liquid - with L-Glutamine, Invitrogen, Karlsruhe, Germany, Cat.-No. 31985-047

<sup>5</sup> Passive Lysis 5X Buffer, Promega, Mannheim, Germany, Cat.-No. E1941

<sup>6</sup> VICTOR Light Luminescence Counter, PerkinElmer, Rodgau-Jügesheim, Germany, Cat.-No. 1420-060

<sup>7</sup> Dual-Luciferase® Reporter 1000 Assay System, Promega, Mannheim, Germany, Cat.-No. E1980

luciferase a delay of 1.6 seconds before starting the measurement allowed complete mixing of the reagent with the lysate. The intensity of the luminescence was recorded for 4 seconds. Subsequently 45µl of Stop&Glow solution were added through the second dispenser, quenching the luminescence of the firefly luciferase and supplying the substrate for the *Renilla* luciferase, coelenterazine. After another delay of 1.6 seconds the luminescence of the control luciferase was recorded for 2 seconds. See complete program in supplementary methods.

### **Dose-response assays**

| Amount of candidate cDNA | Amount of pCS2+ |
|--------------------------|-----------------|
| 12.5ng                   | 87.5ng          |
| 25ng                     | 75ng            |
| 50ng                     | 50ng            |
| 100ng                    | 0ng             |

**Table 2 Dose-response candidate cDNA amount per well**

## Dual-luciferase assay program for Victor Light luminometer

|   | Description                              | Specifications       | Values         |
|---|------------------------------------------|----------------------|----------------|
| 1 | Injection of LARII solution              | Injector             | 1              |
|   |                                          | Speed                | 5              |
|   |                                          | Volume               | 45 µL          |
|   |                                          | Increment            | 0 µL           |
|   |                                          | Replicate            | 1              |
|   |                                          | Injection mode       | aspVol=dispVol |
|   |                                          | Repeated operation   | Yes            |
| 2 | Mixing of LARII and lysate               | Shaking duration     | 1.6 s          |
|   |                                          | Shaking speed        | Fast           |
|   |                                          | Shaking diameter     | 0.20 mm        |
|   |                                          | Shaking type         | Linear         |
|   |                                          | Repeated operation   | Yes            |
| 3 | Measurement of firefly luciferase signal | Name of the label    | CPS-1s         |
|   |                                          | Label technology     | Luminometry    |
|   |                                          | Emission filter name | No filter      |
|   |                                          | Emission filter slot | A7             |
|   |                                          | Measurement time     | 1.0 s          |
|   |                                          | Emission aperture    | Normal         |
| 4 | Measurement of firefly luciferase signal | Name of the label    | CPS-1s         |
|   |                                          | Label technology     | Luminometry    |
|   |                                          | Emission filter name | No filter      |
|   |                                          | Emission filter slot | A7             |
|   |                                          | Measurement time     | 1.0 s          |
|   |                                          | Emission aperture    | Normal         |
| 5 | Measurement of firefly luciferase signal | Name of the label    | CPS-1s         |
|   |                                          | Label technology     | Luminometry    |
|   |                                          | Emission filter name | No filter      |
|   |                                          | Emission filter slot | A7             |
|   |                                          | Measurement time     | 1.0 s          |
|   |                                          | Emission aperture    | Normal         |
| 6 | Measurement of firefly luciferase signal | Name of the label    | CPS-1s         |
|   |                                          | Label technology     | Luminometry    |
|   |                                          | Emission filter name | No filter      |
|   |                                          | Emission filter slot | A7             |
|   |                                          | Measurement time     | 1.0 s          |
|   |                                          | Emission aperture    | Normal         |
| 7 | Measurement of firefly luciferase signal | Name of the label    | CPS-1s         |
|   |                                          | Label technology     | Luminometry    |
|   |                                          | Emission filter name | No filter      |
|   |                                          | Emission filter slot | A7             |
|   |                                          | Measurement time     | 1.0 s          |
|   |                                          | Emission aperture    | Normal         |
| 8 | Injection of Stop&Glow solution          | Injector             | 2              |
|   |                                          | Speed                | 5              |
|   |                                          | Volume               | 45 µL          |
|   |                                          | Increment            | 0 µL           |
|   |                                          | Replicate            | 1              |
|   |                                          | Injection mode       | aspVol=dispVol |
|   |                                          | Repeated operation   | Yes            |
| 9 | Mixing of Stop&Glow and lysate           | Shaking duration     | 1.6 s          |
|   |                                          | Shaking speed        | Fast           |
|   |                                          | Shaking diameter     | 0.20 mm        |
|   |                                          | Shaking type         | Linear         |
|   |                                          | Repeated operation   | Yes            |

|    | <b>Description</b>                       | <b>Specifications</b> | <b>Values</b> |
|----|------------------------------------------|-----------------------|---------------|
| 10 | Measurement of Renilla luciferase signal | Name of the label     | CPS-1s        |
|    |                                          | Label technology      | Luminometry   |
|    |                                          | Emission filter name  | No filter     |
|    |                                          | Emission filter slot  | A7            |
|    |                                          | Measurement time      | 1.0 s         |
|    |                                          | Emission aperture     | Normal        |

**Table 3 VictorLight luminometer program**



## Data processing

The raw luminescence data was exported from the VictorLight software as Excel-sheets, parsed using a custom-tailored parser written in BASIC and imported into the database. The raw luminescence values were filtered out if they were below an absolute level of 8000 relative units for the *Renilla* luciferase signal and 100 relative units for the firefly signal. The limit for the firefly luciferase signal was 5 times the background signal. One value pair of reporter and control signal was only processed further if both values were above their respective thresholds.

Reporter luciferase signals were corrected against the control luciferase signal within one value pair. To reduce the effect of outliers within the group of triplicates the median was calculated as opposed to the average, see equation 1. The standard deviation was calculated according to equation 2. This value was then normalized against the average of ratios within this 96-well plate of clones to correct for variation between different plates, see equation 3. Standard deviations were normalized with the same value.

The normalized ratios of clones were transformed to log space to allow generating symmetry between repressors and activators. A histogram with a bin size of 0.02 and a range of -1.00 to +2.00 was calculated using the Prism software<sup>8</sup>. A Gaussian normal distribution was fitted to the data (equation 4). The  $R^2$  for the fit was 0.9940, indicating the validity of the mathematical approach as the regression curve fits the data well. However, the runs test shows a significant deviation from the model in the data ( $p < 0.0001$  in 31 runs) reflecting the fact that a significant number of clones show a more-than-random deviation from the average luminescence ratio. Measured ratios below the first or above the second intersection with the x-axis were considered as

---

<sup>8</sup> Prism4 for Macintosh, Version 4.0a, GraphPad Software, Inc., San Diego, USA

high-confidence candidates as they are unlikely to be random variations from the mean value, see equation 5(1).

To determine the standard variation of the ratios, the median of all standard deviation was calculated using Prism. Ratios with relative standard deviations larger than the median of all ratios plus the standard deviation of the median were excluded from this high-confidence candidate list; see equation 5(2).

$$ratio(i)_{median} = 10^{\frac{\sum_{i=1}^{i-1} \log \frac{luc_i}{renilla_i}}{n}}, n = \text{number of assays, } luc_i = \text{firefly luciferase signal, Renilla}_i = \text{Renilla signal}$$

**Equation 1 calculation of median ratio firefly over Renilla**

$$\sigma(i) = \sqrt{\frac{\sum_{e=1}^{e-1} (ratio(e) - ratio(i)_{median})^2}{n-1}}, \sigma = \text{standard deviation } i = \text{individual clone, } n = \text{number of assays, i.e. 2 or 3}$$

**Equation 2 Calculation of standard deviation**

$$ratio(i)_{corrected} = \frac{ratio(i)_{median}}{\frac{\sum_{e=1}^{e-1} ratio(e)_{median}}{n}}, i = \text{individual clones, } n = \text{number of clones per plate}$$

**Equation 3 corrected of median ratio across plate**

$$y = \frac{A}{\sigma\sqrt{2\pi}} e^{-\frac{(x-\bar{x})^2}{2\sigma^2}}, \text{ A= integral area of graph, } \sigma = \text{standard deviation of data, } y = \text{value on y-axis for}$$

any x,  $\bar{x}$  = mean of x-values

#### Equation 4 Gaussian distribution for ratios

$$(1) \text{ratio}(i)_{corrected} < \text{threshold}_{repressor} \vee \text{ratio}(i)_{corrected} > \text{threshold}_{activator}, \text{threshold} = \text{global}$$

thresholds

$$(2) \sigma(i) \leq \tilde{\sigma} + \sigma(\sigma), \sigma(i) = \text{standard deviation of clone, } \tilde{\sigma} = \text{median of all standard deviations, } \sigma(\sigma) = \text{standard deviation of all standard deviations}$$

#### Equation 5 Criteria for high-confidence candidates

### ***In situ* hybridization robot Intavis InSituPro program specification**

|    | Command     | Parameters                                | Comment                                            |
|----|-------------|-------------------------------------------|----------------------------------------------------|
| 1  | SetTempReg  | T0 (OFF)                                  |                                                    |
| 2  | PrimeNeedle | 12000                                     |                                                    |
| 3  | IncubateVT  | 15 min 150 PTW->Specimen                  | Wash with PTw                                      |
| 4  | IncubateVT  | 15 min 150 Hyb-mix->Specimen              | Wash Hyb.-Mix                                      |
| 5  | SetTempReg  | T2 (HIGH)                                 |                                                    |
| 6  | IncubateVT  | 1 h 150 Hyb-mix->Specimen                 | Prehybridization                                   |
| 7  | IncubateVT  | 8 h 200 Probe->Specimen                   | Hybridization                                      |
| 8  | IncubateVT  | 8 min 200 2xSSC/50%FA->Specimen 5x        | Posthybwash 1                                      |
| 9  | IncubateVT  | 10 min 200 2xSSC/50%FA->Specimen          | Posthybwash 1                                      |
| 10 | IncubateVT  | 8 min 200 2xSSC->Specimen 5x              | Posthybwash 2                                      |
| 11 | IncubateVT  | 10 min 200 2xSSC->Specimen                | Posthybwash 2                                      |
| 12 | IncubateVT  | 8 min 200 0.2xSSC->Specimen 5x            | Posthybwash 3                                      |
| 13 | IncubateVT  | 10 min 150 0.2xSSC->Specimen              | Posthybwash 3                                      |
| 14 | SetTempReg  | T0 (OFF)                                  |                                                    |
| 15 | Wait        | 30 min                                    |                                                    |
| 16 | IncubateVT  | 10 min 150 PTW->Specimen 2x               | PTw                                                |
| 17 | IncubateVT  | 1 h 200 Blocking soln->Specimen           | Blocking                                           |
| 18 | IncubateVT  | 4 h 200 Dig antibody->Specimen            | DIG antibody                                       |
| 19 | IncubateVT  | 8 min 200 PTW->Specimen 8x                | PTw                                                |
| 20 | IncubateVT  | 8 min 200 Prestaining buffer->Specimen 2x | Prestain Buffer                                    |
| 21 | Pause       |                                           | Add staining buffer to position G and press return |
| 22 | IncubateVT  | 8 min 200 Staining buffer->Specimen 2x    | Staining buffer                                    |
| 23 | PrimeNeedle | 12000                                     |                                                    |
| 24 | SetTempReg  | T0 (OFF)                                  |                                                    |

**Table 4 Intavis InSituPro robot program**

| Vial      | Buffer             | Volume ml |
|-----------|--------------------|-----------|
| A         | PTW                | 72.6      |
| A2        |                    |           |
| B         | Hyb-mix            | 10.2      |
| C         | 2xSSC/50%FA        | 37.6      |
| D         | 2xSSC              | 37.6      |
| E         | 0.2xSSC            | 36.1      |
| F         | Prestaining buffer | 13.2      |
| G         | Staining buffer    | 13.2      |
| H         |                    |           |
| I         |                    |           |
| J         |                    |           |
| K         |                    |           |
| L         | Blocking solution  | 7.1       |
| M         | Dig antibody       | 7.1       |
| Reservoir |                    | 224.0     |
| Basket    | Specimen           | Probe     |

**Table 5 Loading form for InSitu Robot Volumes indicated are for 30 probes. Positions are named according to standard nomenclature of manufacturer**

## Transregulation screen database description

**A** General Luminescence In situ Reference dose response

09D\_G01 Zfp-161 0.22562 3 / 3 C01\_A10

Description: Homolog of Gallus gallus \*Zinc finger protein Zfp-161

96-well: 09D 384-well: 09\_N02

Rev read (M13F, T7): ENSORLT00000005168

Frw read (M13R, Sp6): ENSORLT00000005168

M13R:  No  Yes  Fail SP6:  No  Yes  Fail

M13F:  No  Yes  Fail T7:  No  Yes  Fail

Comment: clear hit on ENSORLG00000004128

Get candidates In situ report Export candidates

Creation date: 28/11/2006 Statistics Repression threshold: 0.2859

Creation account: Admin Activation threshold: 2.8732

**B** General Luminescence In situ Reference dose response

09D\_G01 Zfp-161 0.22562 C01\_A10

raw data

|       |         |                          |
|-------|---------|--------------------------|
| 14018 | 1264389 | Look at single plates    |
| 10500 | 1118944 |                          |
| 11347 | 1047796 | Look at triplicate plate |

filtered data

|       |         |         |
|-------|---------|---------|
| 14018 | 1264389 | 0.01109 |
| 10500 | 1118944 | 0.00940 |
| 11347 | 1047796 | 0.01083 |

corrected ratio (median): 0.22562 Corrected deviation across screen

absolute corrected dev: 0.01968 Average: 17.92%

relative corrected dev: 8.7% St.deviation: 14.51%

**C** General Luminescence In situ Reference dose response

09D\_G01 Zfp-161 0.22562 C01\_A10

24: complete retina  
26: complete retina (restriction to periphery)  
32: absent in eye

dorsal 23 PCR product:  No  Yes

frontal 23 riboprobe:  No  Yes

dorsal 26 Category:  N  B  A  C

In situ report New image

**D** General Luminescence In situ Reference dose response

09D\_G01 Zfp-161 0.22562 C01\_A10

Retransformation:  No  Yes In situ:  N  A  B  C

CMV-based:  N  A  B  C  D

|             |             |             |                 |
|-------------|-------------|-------------|-----------------|
|             | 1.00 ± 0.16 |             | 0.0868 ± 0.0136 |
| 20 ng/well  | 0.55 ± 0.01 | 1.00 ± 0.02 | 0.0479 ± 0.0009 |
| 40 ng/well  | 0.51 ± 0.02 | 0.92 ± 0.03 | 0.0440 ± 0.0015 |
| 80 ng/well  | 0.45 ± 0.05 | 0.81 ± 0.10 | 0.0389 ± 0.0046 |
| 160 ng/well | 0.30 ± 0.01 | 0.55 ± 0.01 | 0.0264 ± 0.0006 |

SV40-based:  N  A  B  C  D

|             |             |             |                |
|-------------|-------------|-------------|----------------|
|             | 1.00 ± 0.05 |             | 13.43 ± 0.7237 |
| 20 ng/well  | 1.06 ± 0.06 | 1.00 ± 0.06 | 14.28 ± 0.8260 |
| 40 ng/well  | 0.00 ± 0.00 | 0.00 ± 0.00 | ± 0.0000       |
| 80 ng/well  | 0.94 ± 0.09 | 0.89 ± 0.08 | 12.67 ± 1.1493 |
| 160 ng/well | 0.87 ± 0.02 | 0.82 ± 0.02 | 11.74 ± 0.3075 |

**Figure 1 Database Graphical User Interface (GUI) Four of the five existing main GUI displays are depicted here.** The user can toggle between the displays using the tab labels at the top of the display. The top section of all displays is the identical. From left to right it contains the clone id, the name of the gene if available, the fold-change in corrected luminescence ration in the screen, the number of successful and total number of assays and a candidate id if applicable. (A) Main display. The first panel from top to bottom contains a short description and the position of the clone in 96- and 384-well format. The second panel gives information about the gene linked to the clone. Information for both forward and reverse read of the clone is available. The radio buttons give information whether the clone has been re-sequenced. The next panel holds a field for comments as well as three buttons for extracting candidates, creating expression pattern reports and exporting candidate clone

information to other programs. The bottommost panel contains administrative information, a link to the statistics page and the global thresholds set for defining candidates. (B) The first panel contains the raw luminescence values and two links to other representations of the raw data. The second panel contains the filtered raw data and the raw ratios. The third panel contains the corrected ratio, the absolute corrected standard deviation and standard deviation in relation to the corrected ratio. It also contains the average of all standard deviations across the screen and their standard deviation. (C) The “In situ” tab contains all information about available expression data. The first panel contains manually annotated expression pattern information. The second panel holds a list of pictures with the orientation and stage of the embryo depicted. The image list can be scrolled and double-click on a picture will open it. The two radio buttons indicate the presence or absence of PCR products and riboprobes for in situ hybridization. Finally, it contains the in situ category. The tab “Reference” is not shown as it only contains a list of referenced files similar to the “In situ tab” (D) This display contains all information about the dose-response curve using CMV::*Renilla* (second panel) or SV40::*Renilla* (third panel) as a control. Each of the two panels contains a check box that indicates the summary of the dose-response experiment. In addition the corrected ratios of the different concentrations of regulatory clones together with their standard deviation are shown. The ratio is either normalized against a negative control (first column) or against the lowest concentration of regulator (second column). The third column shows the raw values. The uppermost panel contains some additional practical information about the availability of a retransformed clone.

## Generation of fusion proteins

| Name           | Identifiers        |     | Primer sequence                                    |
|----------------|--------------------|-----|----------------------------------------------------|
| ELG<br>protein | ENSORLG00000013703 | Frw | CCGGAATTCAGC ATGGAGGTGGAGGAGGGCGAG                 |
|                |                    | Rev | CTTGCTCACCATGGC<br><i>GGCGTCAAAGTCGTCGCTGCTGT</i>  |
| NHL<br>protein | ENSORLG00000014595 | Frw | CCGGAATTCAGC ATGCTGCTGCTGAAGAGGAG                  |
|                |                    | Rev | CTTGCTCACCATGGC<br><i>GACCACGTACGTGCCTAGGCTGAA</i> |
| Ndrg3          | ENSORLG00000013821 | Frw | CCGGAATTCAGC ATGTCAACTGTTTGGACCTGGA                |

| <b>Name</b> | <b>Identifiers</b> |     | <b>Primer sequence</b>                          |
|-------------|--------------------|-----|-------------------------------------------------|
|             |                    | Rev | CTTGTCATCATGAC<br><i>ACACGAGACCTCCATGGTCTGA</i> |
| SRP40       | ENSORLG00000009268 | Frw | CCGGAATTCAGC <i>ATGAGTGGAAAGTCGCGTCTTCA</i>     |
|             |                    | Rev | CTTGCTCACCATGGC<br><i>GTGTTTGCTGTCTGCCGAGGG</i> |
| Zfp161      | ENSORLG00000004128 | Frw | CCGGAATTCAGC <i>ATGTCTGACCTACTGAGATACA</i>      |
|             |                    | Rev | CTTGTCATCATGAC<br><i>GCAGTCTCCTGAGTTGTGCGA</i>  |
| RBPMS2      | ENSORLG00000001493 | Frw | CCGGAATTCAGC <i>ATGTATATTAACACGACAGT</i>        |
|             |                    | Rev | CTTGCTCACCATGGC<br><i>CTTCAGCTGGACAAAGGTATG</i> |

Table 6 Fusion protein cloning primers
